# Supplementary material for: The effectiveness of workplace dietary interventions: protocol for a systematic review and meta-analysis
Source: Springer Nature journal article supplement (doi:10.1186/s13643-016-0200-1), 2016-02-03
Supplement: MOESM3 [file 9787730]

### Additional File 3: Search strategy for MEDLINE

1. employee\$.ti,ab.
2. worker\$.ti,ab.
3. (workforce\$ or work force\$).ti,ab.
4. \*work/
5. \*workplace/
6. (workplace\$ or work place\$).ti,ab.
7. (worksite\$ or work site\$).ti,ab.
8. (workfloor\$ or work floor\$).ti,ab.
9. (work adj2 environment).ti,ab.
10. \*employment/
11. 1 or 2 or 3 or 4 or 5 or 6 or 7 or 8 or 9 or 10
12. \*food/
13. food\$.ti,ab.
14. exp diet/
15. diet\$.ti,ab.
16. nutri\$.ti,ab.
17. fruit/
18. fruit\$.ti,ab.
19. vegetables/
20. vegetable\$.ti,ab.
21. energy.ti,ab.
22. fat\$.ti,ab.
23. \*dietary fats/
24. salt\$.ti,ab.
25. fibre\$.ti,ab.

26. (sugar\$ adj2 sweetened\$ adj2 beverages\$).ti,ab.
27. (portion\$ adj2 size\$).ti,ab.
28. (serving\$ adj2 size\$).ti,ab.
29. cafeteria\$.ti,ab.
30. canteen\$.ti,ab.
31. (healthy adj2 eating).ti,ab.
32. (catering\$ adj2 service\$).ti,ab.
33. (catering\$ adj2 establishment).ti,ab.
34. (food\$ adj2 service\$).ti,ab.
35. exp food services/
36. (food\$ adj2 environment\$).ti,ab.
37. 12 or 13 or 14 or 15 or 16 or 17 or 18 or 19 or 20 or 21 or 22 or 23 or 24 or 25 or 26 or 27 or 28 or 29 or 30 or 32 or 32 or 33 or 34 or 35 or 36
38. 11 and 37
39. intervention\$.ti,ab.
40. \*intervention studies/
41. campaign\$.ti,ab.
42. program\$.ti,ab.
43. (strategy\$ or strategies\$).ti,ab.
44. award\$.ti,ab.
45. scheme\$.ti,ab.
46. promotion\$.ti,ab.
47. exp health promotion/
48. 39 or 40 or 41 or 42 or 43 or 44 or 45 or 46 or 47
49. 38 and 48
50. (randomized controlled trial OR controlled clinical trial).pt.
51. randomized controlled trials/
52. random allocation/

53. double-blind method/
54. single-blind method/
55. 50 or 51 or 52 or 53 or 54
56. animal/ not human/
57. 55 not 56
58. clinical trial.pt.
59. clinical trials/
60. (clinic\$ adj25 trial\$).tw.
61. ((singl\$ or doubl\$ or trebl\$ or tripl\$) adj (mask\$ or blind\$)).tw.
62. Random\$.tw.
63. Research Design/
64. (latin adj square).tw.
65. 58 or 59 or 60 or 61 or 62 or 63 or 64
66. 65 not 56
67. 66 not 57
68. Comparative study/
69. Evaluation studies/
70. Follow-up studies/
71. Prospective studies/
72. (control\$ or prospective\$ or volunteer\$).tw.
73. Cross-over studies/
74. 68 or 69 or 70 or 71 or 72 or 73
75. 74 not 56
76. 75 not (57 and 67)
77. 57 or 67 or 76
78. Controlled study/
79. (Controlled Trial or non-randomised controlled trial).ti,ab.

80. Controlled adj (before and after study).ti,ab.

81. ((before and after study) adj10 control).ti,ab.

82. (Interrupted Time Series adj10 control).ti,ab.

83. 78 or 79 or 80 or 81 or 82

84. 83 or 77

85. 49 and 84

86. limit 85 to (humans)
